# Supplementary material for: Neutralising Effects of Different Antibodies on Clostridioides difficile Toxins TcdA and TcdB in a Translational Approach
Source: MDPI journal article supplement (doi:10.3390/ijms24043867), 2023-02-15
Supplement: s1 [file s1]

Supplement

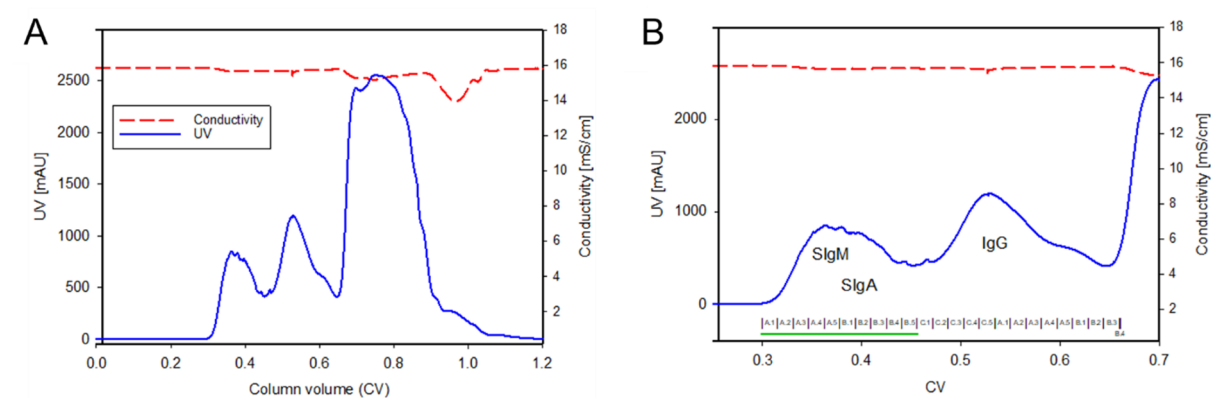

Supplementary Figure S1: Preparative size exclusion chromatography of concentrated caprine whey. (A) Complete elution profile. The first peak represents slgM/slglA fraction; the second peak IgG; and the third peak other whey proteins, e.g., lactoferrin, albumin, lactoglobulin and lactalbumin. (B) Zoom-in with the distribution of slgM and slglA based on SDS-PAGE analysis.

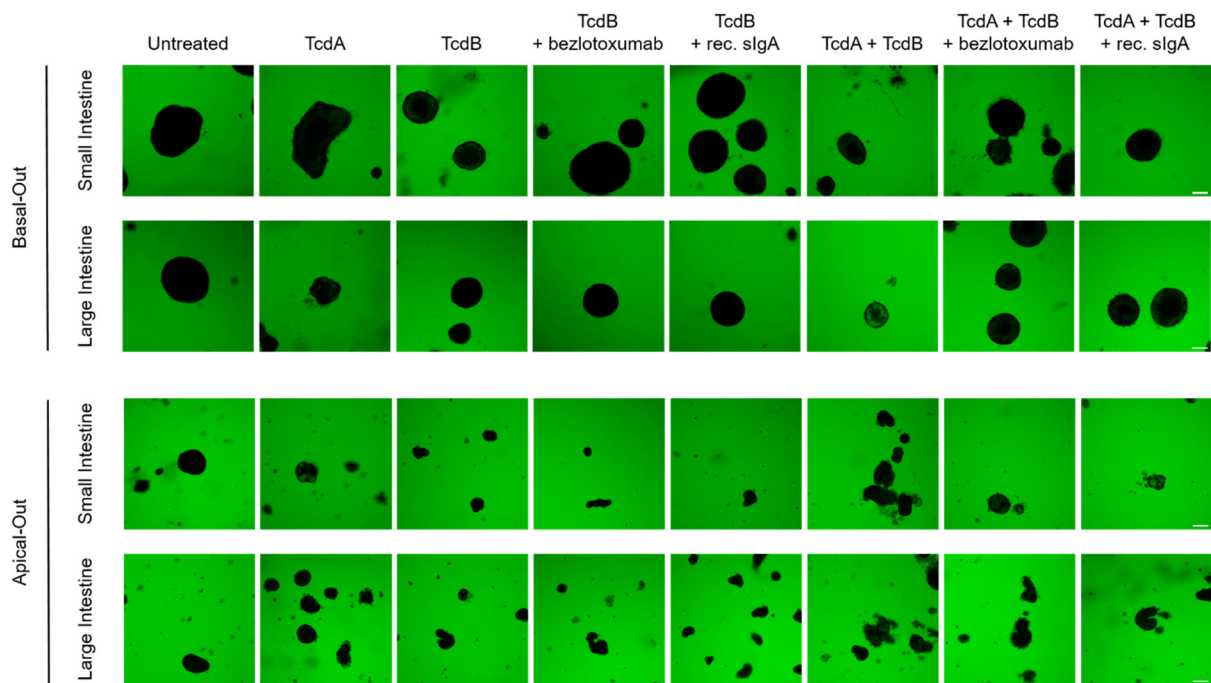

Supplementary Figure S2: Representative images from FITC-dextran barrier integrity assays using canine basal-out and apical-out organoids. Scale bars apply to all images and are 100  $\mu$ m in size.
